# Supplementary material for: The Challenge of Long-Term Cultivation of Human Precision-Cut Lung Slices
Source: PubMed Central journal article supplement (PMC8891143; doi:10.1016/j.ajpath.2021.10.020), 2022-02

**A**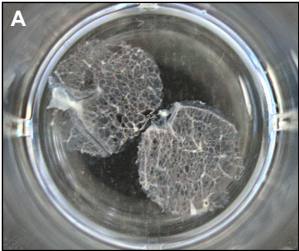**B**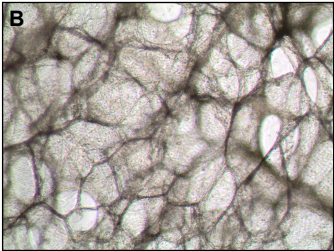

Supplement: mmc1.pdf [file mmc1.pdf]
