# Supplementary material for: The Challenge of Long-Term Cultivation of Human Precision-Cut Lung Slices
Source: PubMed Central journal article supplement (PMC8891143; doi:10.1016/j.ajpath.2021.10.020), 2022-02

Lung tissue  
from autopsy

H&E

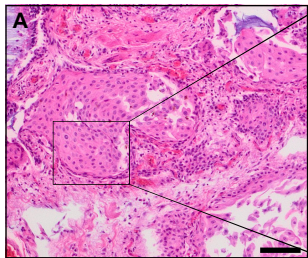

H&E

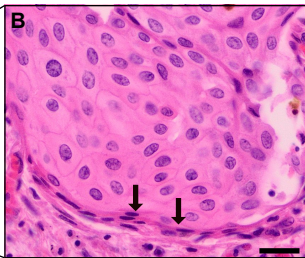

p63

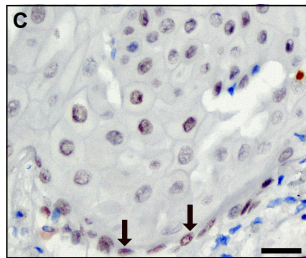

PCLS

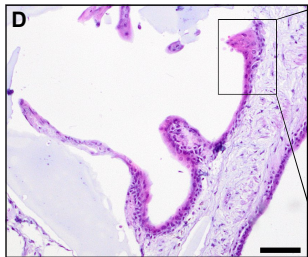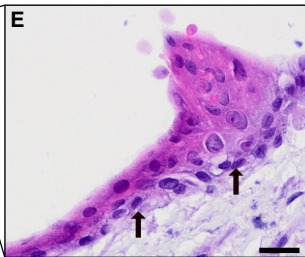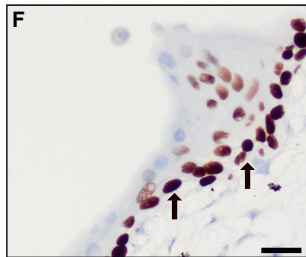

Supplement: mmc2.pdf [file mmc2.pdf]
