# Supplementary material for: The Challenge of Long-Term Cultivation of Human Precision-Cut Lung Slices
Source: PubMed Central journal article supplement (PMC8891143; doi:10.1016/j.ajpath.2021.10.020), 2022-02

# Enrichment Analysis (GO.BiologicalFunction) FDR < 0.05

## Cluster 1 (133)

response to lipopolysaccharide ●  
 response to molecule of bacterial origin ●  
 cellular response to lipopolysaccharide ●  
 cellular response to molecule of bacterial origin ●  
 response to virus ●  
 cellular response to biotic stimulus ●  
 defense response to virus ●  
 cellular response to tumor necrosis factor ●  
 response to tumor necrosis factor ●  
 toll-like receptor signaling pathway ●

## Cluster 2 (428)

T cell activation ●  
 regulation of leukocyte activation ●  
 lymphocyte differentiation ●  
 regulation of T cell activation ●  
 regulation of lymphocyte activation ●  
 T cell differentiation ●  
 activation of immune response ●  
 positive regulation of cell activation ●  
 positive regulation of leukocyte activation ●  
 adaptive immune response ●  
 response to lipopolysaccharide ●  
 response to molecule of bacterial origin ●

## Cluster 3 (50)

cornification ●  
 keratinization ●  
 keratinocyte differentiation ●  
 epidermal cell differentiation ●  
 skin development ●  
 epidermis development ●  
 cell-cell junction organization ●

## Cluster 4 (162)

mitochondrial translation ●  
 mitochondrial gene expression ●  
 mitochondrial translational elongation ●  
 mitochondrial translational termination ●  
 translational elongation ●  
 translational termination ●  
 nucleobase-containing small molecule interconversion ●

pathways

pathways

pathways

pathways

### Legend:

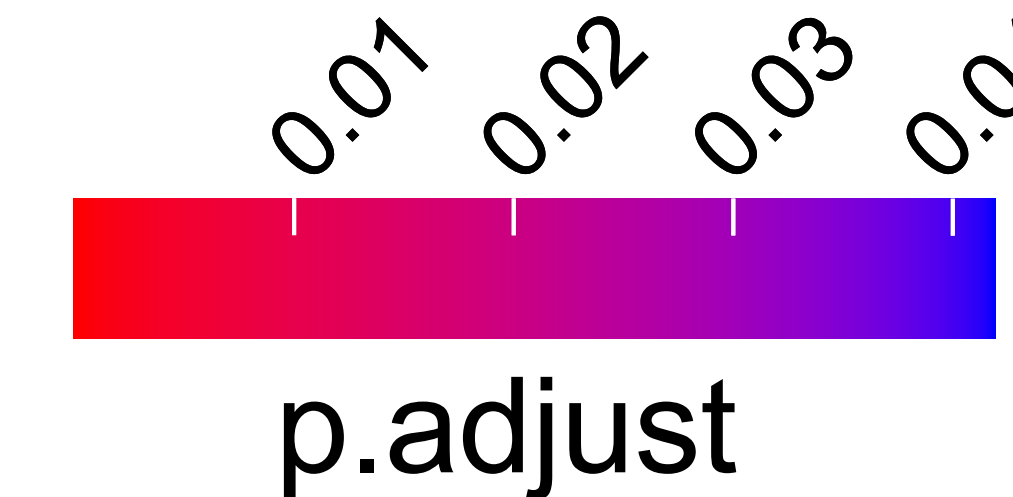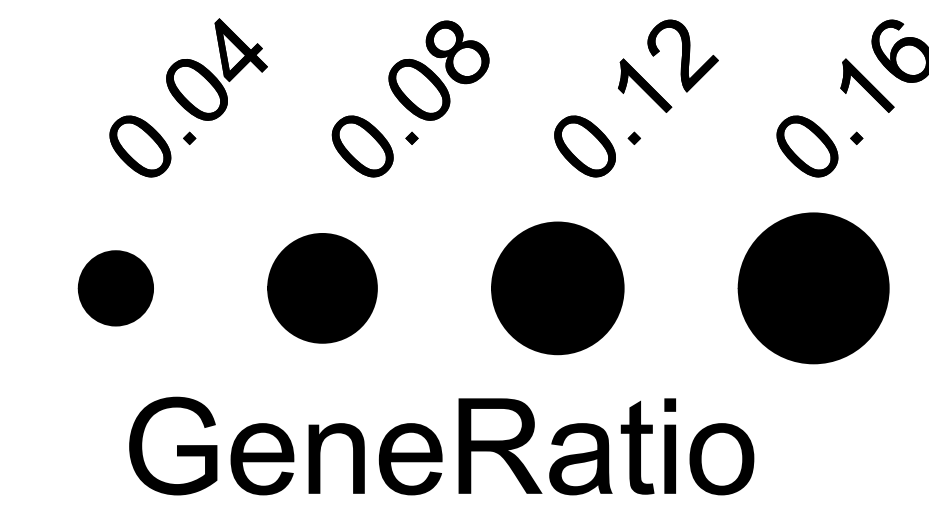

Supplement: mmc3.pdf [file mmc3.pdf]
